# Supplementary material for: Production, optimisation and characterisation of angiotensin converting enzyme inhibitory peptides from sea cucumber (Stichopus japonicus) gonad
Source: Royal Society of Chemistry journal article supplement (doi:10.1039/c7fo01388d), 2017-12-11

Supplementary data:

Supplementary Figure S1 The MS spectra of three peptides of EIYR (a), LF (b) and NAPHMR (c).

(a)

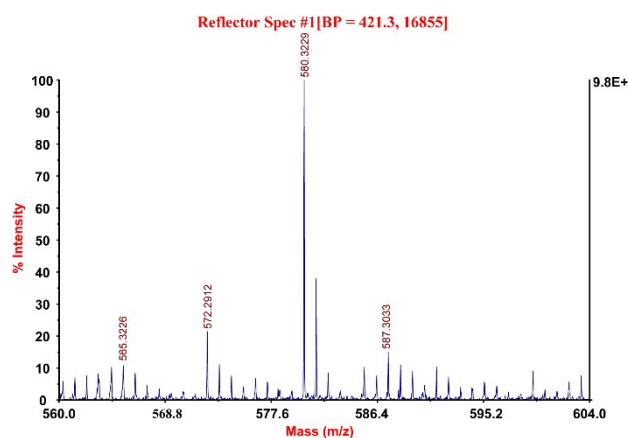

(b)

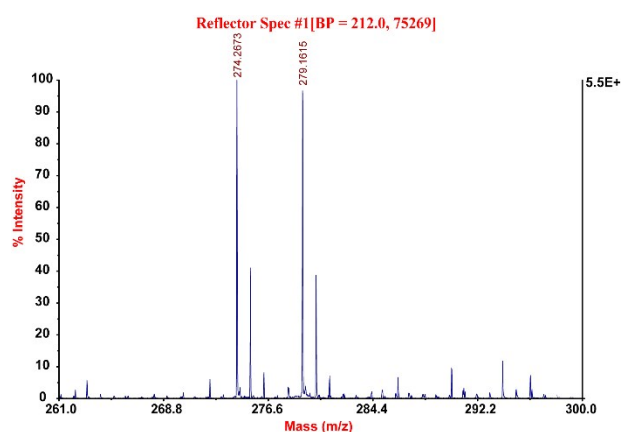

(c)

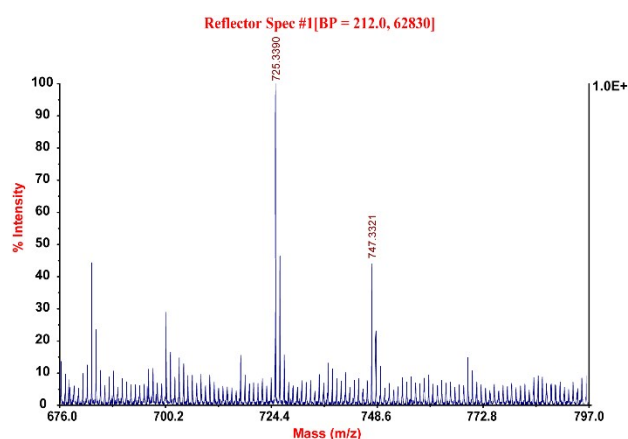

Supplementary Figure S2 The MS/MS spectrum of synthetic peptide NAPHMR.

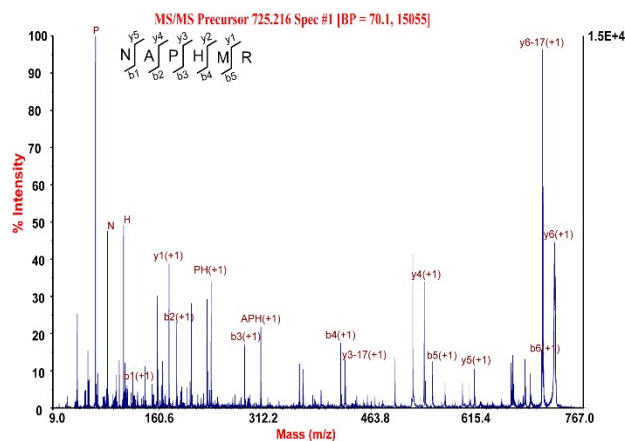

Supplementary Figure S3 Comparative ACE inhibitory activities of sea cucumber gonad hydrolysates by different commercial enzymes with hydrolysis time of 6 h and E/S ratio of 1.0 %.

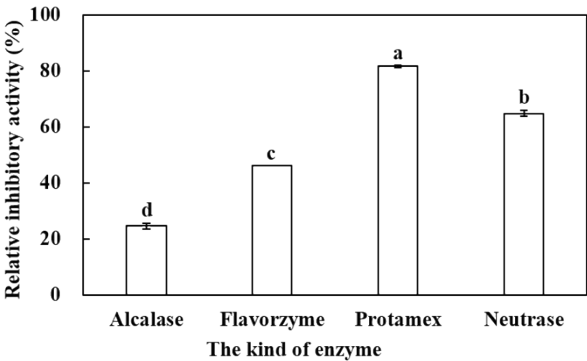

Supplement: c7fo01388d1.pdf [file c7fo01388d1.pdf]
